# Supplementary material for: A real-world study evaluating the safety and utility of a two-row stapler reload on pulmonary vasculature
Source: PubMed Central journal article supplement — J Thorac Dis. 2024 Jun 14;16(6):3753–63. doi: 10.21037/jtd-24-179 (PMC11228709; doi:10.21037/jtd-24-179), 2024-06-14
Supplement: jtd-16-06-3753-dss.pdf [file jtd-16-06-3753-dss.pdf]

## Data Sharing Statement

|                     |                                                                                                                                                    |                                                                                                                                                                                                                                   |
|---------------------|----------------------------------------------------------------------------------------------------------------------------------------------------|-----------------------------------------------------------------------------------------------------------------------------------------------------------------------------------------------------------------------------------|
| <b>Article Info</b> | Article Information: <a href="https://dx.doi.org/10.21037/jtd-24-179">https://dx.doi.org/10.21037/jtd-24-179</a>                                   |                                                                                                                                                                                                                                   |
| <b>Item</b>         | <b>Question</b>                                                                                                                                    | <b>Authors' Response</b><br>(place "-" if not applicable)                                                                                                                                                                         |
| 1                   | Would you like to share data collected for your study to others?                                                                                   | The data were used under license for the current study and are therefore not publicly available. Data can be provided by the authors upon reasonable request and with permission of Medtronic.                                    |
| 2                   | If not, would you like to share the reason for your decision?                                                                                      | The data and support documents (i.e., study protocol) that support the findings of this study are available from Medtronic, but restrictions apply to the availability of these data as they were used under license.             |
| 3                   | What data in particular will be shared?                                                                                                            | Clinical data supporting the findings of the study as well as support documents (i.e., the study protocol).                                                                                                                       |
| 4                   | Any other documents will be share? Such as study protocol, statistical analysis plan, informed consent form, clinical study report, analytic code. | Study protocol, informed consent forms and clinical study report are available from the authors upon reasonable request and with permission of Medtronic.                                                                         |
| 5                   | When will data availability begin?                                                                                                                 | Upon reasonable request and with permission of Medtronic after publication of the submitted manuscript.                                                                                                                           |
| 6                   | When will data availability end?                                                                                                                   | 10 years after publication of the manuscript.                                                                                                                                                                                     |
| 7                   | To whom will you share the data?                                                                                                                   | Data will be shared upon reasonable request and with permission of Medtronic, if a methodologically sound proposal for use of the data is provided. The proposal will need to be approved by Medtronic before data may be shared. |
| 8                   | For what type of analysis or purpose?                                                                                                              | To achieve the aims in the proposal approved by Medtronic that explains what the data will be used for, e.g., for individual participant data meta-analysis.                                                                      |
| 9                   | How or where can the data/documents be obtained?                                                                                                   | The data/documents can be obtained from the corresponding author upon reasonable request and with permission of Medtronic.                                                                                                        |
| 10                  | Any other restrictions?                                                                                                                            | No restrictions in addition to what was already stated in this data sharing statement.                                                                                                                                            |
